# Supplementary material
Source: publisher figshare collection journal article supplement (https://gsajournals.figshare.com/ndownloader/files/13991168)
Supplement: Supplementary file 1 [file 13991168]

## Sheet: TableS11
Table S12 Statistics of repeats of M. baccata genome
Type	Repeat Size(bp)	% of genome
TRF	33541313	4.67
RepeatMasker	315102476	43.83
RepeatProteinMask	100515495	13.98
De novo	388258025	54
Total	421047912	58.56
Note: The TRF was used to predict the tandem repeats. RepeatMasker was first used to identify de novo repeat elements in M. baccata. RepeatProteinMask was used to mask the repeat related proteins. Total repeat regions were identified combining all the repeat identified. As there are some overlaps between different methods, the total region is shorter than the sum of repeats identified by all the …
